1 Title Page

2

3 Targeted therapy for *LIMD1*-deficient non-small cell lung cancer subtypes.

4

5 Kathryn Davidson<sup>1†</sup>, Paul Grevitt<sup>1†</sup>, Maria F. Contreras G.<sup>1</sup>, Katherine S. Bridge<sup>2</sup>, Miguel Hermida<sup>3</sup>, Kunal M.

6 Shah<sup>1</sup>, Faraz K Mardakheh<sup>1</sup>, Mark Stubbs<sup>4</sup>, Paul A. Clarke<sup>4</sup>, Rosemary Burke<sup>4</sup>, Pedro Casado-Izquierdo<sup>1</sup>,

7 Pedro R. Cutillas<sup>1</sup>, Sarah A. Martin<sup>1\*</sup>

8 and Tyson V. Sharp<sup>1\*</sup>

9 *Author Affiliations:*

10 1 Barts Cancer Institute, Queen Mary University of London, John Vane Science Centre, Charterhouse

11 Square, London, EC1M 6BQ

12 2 University of York, Wentworth Way, York, YO10 5DD

13 3 Department of Bioengineering, Imperial College, London

14 4 Cancer Research UK Cancer Therapeutics Unit, The Institute of Cancer Research, 15 Cotswold Road,

15 Sutton, SM2 5NG

16

17

18 † *These authors contribute equally.*

19 \* *Corresponding Authors:* [t.sharp@qmul.ac.uk](mailto:t.sharp@qmul.ac.uk)

20 [sarah.martin@qmul.ac.uk](mailto:sarah.martin@qmul.ac.uk)

21

22

23

24 **Keywords:** *LIMD1, Synthetic Lethality, Tumour suppressor, Lung Cancer, NSCLC, targeted*

25 *therapy*

26

27

28

29

30

31 Abstract (draft)

1 An early event in lung oncogenesis is loss of the tumour suppressor gene *LIMD1* (*LIM domains*  
2 *containing 1*); this encodes a scaffold protein, which suppresses tumourigenesis via a number  
3 of different mechanisms. Approximately 45% of non-small cell lung cancers (NSCLC) are  
4 deficient in *LIMD1*<sup>1</sup>, yet this subtype of NSCLC has been overlooked in preclinical and clinical  
5 investigations. Defining therapeutic targets in these *LIMD1* loss-of-function patients is difficult  
6 due to a lack of 'druggable' targets, thus alternative approaches are required. To this end, we  
7 performed the first drug repurposing screen to identify compounds that confer synthetic  
8 lethality with *LIMD1* loss in NSCLC cells. PF-477736 was shown to selectively target *LIMD1*  
9 deficient cells *in vitro* through inhibition of multiple kinases, inducing cell death via apoptosis.  
10 Furthermore, PF-477736 was effective in treating *LIMD1*<sup>-/-</sup> tumors in subcutaneous xenograft  
11 models, with no significant effect in *LIMD1*<sup>+/+</sup> cells. We have identified a novel drug tool with  
12 significant preclinical characterization that serves as an excellent candidate to explore and  
13 define *LIMD1*-deficient cancers as a new therapeutic subgroup of critical unmet need.

14

## 1 Significance Statement:

2 *Here we provide the first proof-of-concept data validating the scope for development of a*  
3 *targeted therapy against the non-small cell lung cancers (NSCLC) subtypes deficient in*  
4 *expression of the LIMD1 tumor suppressor gene. Approximately 45% of NSCLC are deficient in*  
5 *LIMD1<sup>1</sup> representing at least 1.2 million lung cancer patients worldwide; yet this subtype has*  
6 *been ignored in preclinical and clinical investigations with no targeted therapies available. This*  
7 *seminal study applied synthetic lethality drug screening to target the loss/reduction of LIMD1*  
8 *in lung cancer and normal cell lines, identifying and validating the multi-kinase inhibitor PF-*  
9 *477736 as a selectively cytotoxic compound towards LIMD1 deficient cells. This study provides*  
10 *rationale for further investigation into targeting LIMD1 loss in lung cancer, thereby addressing*  
11 *a critical unmet need for therapeutic approaches to targeting LIMD1-deficient cancer subtypes.*

## 13 Introduction

14 Lung cancer remains the most common cancer in the western world with ~2 million cases  
15 reported worldwide each year[1]. The most frequent type of lung cancer is non-small cell lung  
16 cancer (NSCLC), accounting for 84% of total cases, the majority of which are either lung  
17 adenocarcinomas (LUAD) or lung squamous cell carcinomas (LUSC)[1, 2]. The 5-year survival of  
18 lung cancer patients is only 19%, with minimal improvement in the past 30 years. Recent  
19 breakthroughs in immunotherapies and immune checkpoint PD-1/PD-L1 blockade for lung and  
20 several other cancers is encouraging [3-5]. Furthermore, advances in therapeutic research has  
21 led to the advent of highly specific targeted therapies such as tyrosine kinase inhibitors[6].  
22 When used in combination with immunotherapy, this has achieved significant survival benefit  
23 for select patient subgroups[7]. However, only a proportion of patients will benefit (~10%-40%  
24 depending on cancer type), with the overall survival rates remaining largely unchanged[8-12].  
25 This highlights the clear need for novel biomarkers and improved targeted therapies that  
26 extend beyond the current approaches, [13]. Furthermore, the plethora of mechanisms  
27 underlying lung cancer development and progression still remain largely unknown. Driver  
28 alterations have not yet been defined in ~40% of lung cancers. Although mutations in several

1 well-known oncogenes and tumour suppressor genes have been detected in certain lung  
2 cancers with respect to their development and evolution, a large proportion of patients do not  
3 contain these common truncal mutations [14-17]. An improved understanding of the biology  
4 and enhanced treatment options are urgently needed.

5

6 *LIMD1* is a tumour suppressor gene encoded at the frequently ablated 3p.21.3 genomic locus  
7 in lung cancer. Reduced *LIMD1* copy number alterations in LUAD correlate with poor patient  
8 prognosis [18]. Furthermore, *LIMD1*<sup>-/-</sup> mice develop increased numbers and larger volumes of  
9 lung adenomas following exposure to the carcinogen urethane or upon crossing with *KRAS*<sup>G12D</sup>  
10 mice, highlighting loss of *LIMD1* as both a driver and major potential LUAD and LUSC  
11 susceptibility gene [18, 19]. Human lung cancers deficient in *LIMD1* expression represent 50%  
12 and 85% of LUAD and LUSC respectively [18], and have until now been almost completely  
13 overlooked. This biomarker signifies a new and exciting avenue for investigation in lung cancer  
14 biology and importantly with reference to this study, a novel treatment strategy for *LIMD1*-  
15 deficient tumours.

16

17 *LIMD1* is a member of the Zyxin family of LIM-domain proteins, which feature three tandem  
18 LIM domains at the C-terminus that facilitate protein-protein interactions and an unstructured  
19 N-terminal pre-LIM region [20]. Whilst *LIMD1* has no enzymatic function, it plays an important  
20 role in modulating many essential cellular homeostatic processes by operating as a nodal  
21 molecular scaffold [18, 21-29]. We have shown a critical role of *LIMD1* as a core component of  
22 the microRNA-induced silencing complex (miRISC), scaffolding and dictating miRISC functional  
23 complexity [24], and in regulating the hypoxic response through mediating efficient  
24 degradation of HIF-1 $\alpha$  by simultaneous binding of HIF prolyl-hydroxylases and the Von-Hippel  
25 Lindau protein (pVHL)[23, 30]. In addition, *LIMD1* binds to and enhances the function of the

1 retinoblastoma protein (pRB), thereby blocking E2F1-driven gene transcription and  
2 subsequent cell cycle progression[21]. Loss of *LIMD1* and its multiple tumour suppressive  
3 functions, leads to alterations and disruption of these key homeostatic regulatory pathways,  
4 driving cellular transformation and cancer progression.

5

6 Despite *LIMD1*'s key homeostatic functions, level of ablation in LUAD/LUSC and the proportion  
7 of patients with this tumour subtype, there are currently no targeted therapies for *LIMD1*-  
8 deficient cancers. Defining therapeutic targets in these *LIMD1* loss-of-function patients is  
9 difficult due to no clear 'druggable' enzymes identified that can be targeted, meaning  
10 alternative approaches are required. This is further complicated due to the number of diverse  
11 pathways impacted through loss of *LIMD1*, therefore targeting downstream pathways in  
12 isolation is not a feasible option. The concept of synthetic lethality provides a rationale for  
13 targeting tumour suppressor gene loss in cancer whereby cellular vulnerabilities acquired by  
14 cells following loss of tumour suppressors are exploited to induce cell death in tumour verses  
15 normal tissue. The prime example of this is the use of PARP inhibitors in *BRCA1* mutant cancers,  
16 which is now an approved targeted therapy in several cancers with loss of function *BRCA1*  
17 mutations [31].

18 To this end, we have performed the first proof-of-concept drug repurposing screen to identify  
19 synthetic lethal compounds with *LIMD1* loss in lung cancer cells. Drug repurposing is an  
20 attractive option as a significant amount of preclinical data and safety profiling has already  
21 been generated for these compounds, allowing expedited clinical trials for alternative  
22 indications [32].

23

24 From our compound library screen, we identified a multi-kinase inhibitor, PF477736 that  
25 selectively kills *LIMD1* negative cells compared to *LIMD1* positive cells, whilst not affecting

1 LIMD1 proficient cells. Whilst this inhibitor was designed as a checkpoint kinase 1 (Chk1)  
2 inhibitor, we have shown that Chk1 inhibition does not confer the synthetic lethal interaction  
3 with LIMD1 loss in these cells. Instead, our data indicates that this inhibitor affects a spectrum  
4 of kinases, inducing significant changes to the phosphoproteome specifically of LIMD1 negative  
5 cells. Finally, we show that this inhibitor of LIMD1 deficient cancer cell proliferation has  
6 therapeutic potential in lung adenocarcinoma, an aetiology of importance in LIMD1 biology.  
7 This study provides the first proof-of-concept that LIMD1 expression can be used as a  
8 stratification marker for treatment, identifying a large group of lung cancer patients that could  
9 benefit from a targeted therapy against *LIMD1* loss.

10

## 11 Results

### 12 ***Drug repurposing screen has identified PF477736 to selectively inhibit LIMD1<sup>-/-</sup> cells.***

13 To identify compounds that selectively target LIMD1<sup>-/-</sup> cells, we screened CRISPR-Cas9  
14 generated isogenic LIMD1<sup>+/+</sup> and LIMD1<sup>-/-</sup> HeLa cells with a compound library of 485  
15 molecularly targeted small molecules. This drug library was collated to include FDA-approved  
16 drugs, clinical candidates and compounds against known cancer pathways [33, 34]. Cells were  
17 treated with a 1  $\mu$ M concentration of each compound, and cell viability was determined after  
18 five days. Upon determination of the  $\Delta Z$ -scores we identified the Checkpoint Kinase 1 (Chk1)  
19 inhibitor PF-477736 as our lead hit, such that it had one of the highest  $\Delta Z$ -scores, causing  
20 significantly decreased cell viability in LIMD1<sup>-/-</sup> cells, compared to the LIMD1<sup>+/+</sup> cells, as well as  
21 not showing overt toxicity in the LIMD1<sup>+/+</sup> line (**Fig. 1A**). We validated this synthetic lethal  
22 interaction across a range of concentrations, in multiple LIMD1<sup>-/-</sup> cell clones (**Fig. 1B-C**). Of  
23 note, this phenotype was validated in our isogenic pair of CRISPR-Cas9 generated lung  
24 adenocarcinoma A549 LIMD1<sup>+/+</sup> and LIMD1<sup>-/-</sup> cells (**Fig. 1B-C**) indicating this effect was not cell  
25 line specific and was relevant in the context of lung cancer biology. In both LIMD1 isogenic cell

1 models, there was a ~2-fold selectivity towards LIMD1<sup>-/-</sup> cells compared to LIMD1<sup>+/+</sup> controls  
2 (**Fig. 1D-E**) demonstrated by a significant difference in SF<sub>50</sub> values (**Fig. S1A-B**). We further  
3 validated this effect using long term clonogenic drug assays, which showed a significant  
4 decrease in the number of colonies for LIMD1<sup>-/-</sup> cells compared to the LIMD1<sup>+/+</sup> upon PF-  
5 477736 treatment (**Fig. 1F-G**). In addition, we treated these isogenic lines with 1 μM PF4 and  
6 measured cell proliferation using bright field imaging on Incucyte Zoom; whilst there was a  
7 modest reduction in proliferation in the LIMD1<sup>+/+</sup> lines upon PF4 treatment (~1.6-fold  
8 reduction in AUC), this effect was significantly more selective in both LIMD1<sup>-/-</sup> clones (~7-fold  
9 reduction in AUC) (**Fig. 1H**). Notably, PF-477736 treatment induced ‘blebbing-like’ structures  
10 of cell membranes in LIMD1<sup>-/-</sup> cells, suggesting that cells may be undergoing increased  
11 apoptosis (**Fig. S1C**). This was confirmed by increased PARP cleavage in LIMD1<sup>-/-</sup> clones  
12 compared to LIMD1<sup>+/+</sup> controls upon PF-477736 treatment. (**Fig. 1I-J**). Annexin V staining  
13 identified increased early and late apoptotic cell populations in PF-477736 treated LIMD1<sup>-/-</sup>  
14 cells (**Fig. S1D**). Taken together, these data indicate that PF-477736 treatment can selectively  
15 target LIMD1<sup>-/-</sup> cells, identifying apoptosis as the dominant mechanism of cell death.

16

### 17 ***PF-477736 selectively kills LIMD1<sup>-/-</sup> cells independent of Chk1 inhibition.***

18 PF-477736 was originally developed by Pfizer for use in combination therapy with DNA damage  
19 inducing agents as a sub-nanomolar ATP-competitive inhibitor of checkpoint kinase 1 (Chk1)  
20 (Chk1 K<sub>i</sub> = 0.49 nM)[35]. However, neither of the two other Chk1 inhibitors in the compound  
21 library (AZD7762 and LY2603618) were identified as hits in the compound screen (**Fig S2A**).  
22 We reasoned this may have been an artefact of the single concentration dose used in drug  
23 screening. We tested an alternative Chk1 inhibitor, SCH900776 (MK-8776, Chk1 K<sub>i</sub> = 3 nM), to  
24 establish if this caused LIMD1<sup>-/-</sup> specific cell death (**Fig. 2A-B**). We did not observe any  
25 difference in cell viability between our HeLa isogenic lines following treatment. RNAi mediated

1 transient knockdown of *CHEK1* in our isogenic lines was also performed, and once again did  
2 not induce any differences in cell viability between these lines (**Fig. 2C-D**). These data indicate  
3 that Chk1 inhibition is not synthetically lethal with LIMD1 loss, and therefore the effects we  
4 see with PF477736 are likely to be through inhibition of an alternative kinase or kinases.

5

6 ***PF-477736 is a broad-spectrum kinase inhibitor that elicits LIMD1<sup>-/-</sup> specific cellular changes in***  
7 ***the phosphoproteome.***

8 With the aim of identifying the kinase responsible for synthetic lethality with LIMD1 loss upon  
9 PF-477736 treatment, we tested the activity of PF-477736 on a panel of 403 recombinant  
10 protein non-mutant kinases and 59 clinically relevant disease mutant kinases. For this, we  
11 utilised the DiscoverX KINOMEScan platform, which involves an *in vitro* ATP-independent  
12 competition assay to measure kinase activity [36]. Optimum inhibitor concentration is defined  
13 as 3-10 fold higher than the  $K_i$  of targeted interactions, therefore as we observe the strongest  
14 synthetic lethal interaction at 1  $\mu$ M, we opted to perform profiling at a PF-477736  
15 concentration of 3  $\mu$ M. Surprisingly, 303 out of the 468 kinases tested were inhibited by over  
16 50%, upon PF-477736 treatment compared to the DMSO control (**Fig. 3A**). We observed a wide  
17 range of inhibition across the kinases tested, with the activity of 18.4% of kinases inhibited by  
18 99%, further highlighting the broad specificity of this inhibitor (**Fig. 3B**). A percentage of control  
19 value of <1% indicates a  $K_d$  value of <30nM., Chk1 activity was reduced to 0.45% by PF-477736,  
20 and a number of other kinases are more potently inhibited by this drug (**Fig. 3C**). Next, in an  
21 endeavour to elucidate which kinases are inhibited by PF-477736 in the cell as opposed to the  
22 *in vitro* study, we analysed the phosphoproteome in our isogenic lines upon drug treatment  
23 (**Fig. 3D**). Following 1-hour treatment with PF477736 we did not observe any significant  
24 changes in the phosphoproteome of HeLa LIMD1<sup>+/+</sup> cells; strikingly however, there were  
25 numerous significant changes occurring in the HeLa LIMD1<sup>-/-</sup> cells (**Fig. 3D**). Principle



1 component analysis (PCA) on this data showed no clear separation between treated and  
2 untreated samples in the LIMD1<sup>+/+</sup> cell line, but a clear separation in the LIMD1<sup>-/-</sup> cell line (**Fig.**  
3 **S3A-B**). This result emphasizes that PF-477736 treatment elicits cellular phosphorylation  
4 changes specifically upon loss of LIMD1 expression. We next utilised Kinase-Substrate  
5 Enrichment Analysis (KSEA) to infer kinase activities from our quantitative phosphoproteomics  
6 data [37]. This analysis identified a number of kinases (CK2A1, CDK1, PKCA, ERK1 and Akt1)  
7 that were significantly more active in LIMD1<sup>-/-</sup> cells compared to LIMD1<sup>+/+</sup> controls (**Fig. S3C**).  
8 Furthermore, CK2A1, PKCA and Akt1 were all significantly inhibited following PF4 treatment  
9 specifically in LIMD1<sup>+/+</sup> cells. Interestingly, LIMD1<sup>+/+</sup> cells exhibited increased CK2A1 activity  
10 after treatment (**Fig. 3E**). In our DiscoverX KINOMEScan data these kinases were inhibited by  
11 90.1%, CK2A1; 89%, PKCA and 77%, Akt1 (**Fig. 3A-C**). To determine whether loss of these  
12 kinases alone could induce synthetic lethality upon LIMD1 loss, we knocked down expression  
13 (via siRNA) of each kinase individually or in combination, however, there were no significant  
14 changes in cell viability between our isogenic lines with each of these targeted knock-downs  
15 (**Fig. S3D**). We next reasoned that knocking down kinase levels significantly with siRNA could  
16 possibly still leave very low levels of protein and activity that could still maintain viability and  
17 thus opted to examine small molecule inhibitors against the targets (both individually and in  
18 combination at a dose that corresponds with SF<sub>80</sub>) with high efficacy of inhibition for the  
19 indicated kinases/pathways. This drug targeted approach was based on inhibitors: MK-2206,  
20 IC<sub>50</sub>s of 5 nM, 12 nM, and 65 nM for AKT1, AKT2, and AKT3; SCH900776 (MK-8776);  
21 Silmiterasertib with an IC<sub>50</sub> of 1 nM for Casein kinase 2 and Gouml 6983 (Go-6983), a potent  
22 broad spectrum PKC inhibitor with IC<sub>50</sub> values are 7, 7, 6, 10, 60 and 20000 nM for PKC $\alpha$ , PKC $\beta$ ,  
23 PKC $\gamma$ , PKC $\delta$ , PKC $\zeta$  and PKC $\mu$  respectively. These drug analyses and combinations did not show  
24 any selectivity towards LIMD1 deficient cells (**Fig. S3E-F**). This suggests that other pathways,  
25 targets or even non-enzymatic susceptibilities are involved, or indeed far greater integrated

1 complex targeting susceptibilities. Regardless of not identifying a specific kinase and/or  
2 pathway, these data do indicate that loss of LIMD1 increases activity and dependency on a  
3 panel of kinases including CK2A1, PKCA and Akt1 which were inhibited by PF4 treatment,  
4 leading to increased apoptosis in LIMD1<sup>-/-</sup> cells.

5

6 ***PF-477736 treatment represents the first proof-of-concept for targeted inhibition of LIMD1***  
7 ***deficient lung cancers.***

8 Previous work from our group has extensively characterised the role of LIMD1 as a tumour  
9 suppressor in lung cancer, therefore we investigated the potential of PF-477736 as a  
10 therapeutic against LIMD1 deficient lung cancer cell lines. We have already shown selectivity  
11 of PF-477736 against LIMD1<sup>-/-</sup> A549 cells, a NSCLC adenocarcinoma cell line (**Fig. 1E**). To test  
12 PF-477736 in non-transformed lung cells we generated LIMD1 hypomorphic mutant Small  
13 Airway Epithelial Cells (SAEC) that had been immortalised by overexpressing Bmi1 (SAEC-  
14 Bmi1). These SAEC are a mixture of both type I and type II alveolar cells, thereby serving as an  
15 appropriate model of lung adenocarcinoma progenitor cells, which have been CRISPR-Cas9  
16 edited and express a N-terminal truncated form of LIMD1 in significantly lower levels  
17 compared to non-targeting controls, thereby representing an *in vitro* model of early LIMD1  
18 ablation/loss in the development of adenocarcinoma (**Fig. 4A**). Comparable with our other  
19 isogenic cell lines, we observed ~2-4-fold selectivity for SAEC LIMD1<sup>-/-</sup> cells (**Fig. 4B, S4A**). Next,  
20 we treated a panel of lung adenocarcinoma cell lines exhibiting a range of LIMD1 protein  
21 expression, with PF-477736 (**Fig. 4C-D**). We observed a significant positive correlation  
22 (Pearson's correlation coefficient = 0.579, p= 0.0302) with LIMD1 protein expression and  
23 surviving fraction at 1µM thereby indicating that it may be possible to use LIMD1 expression  
24 as a biomarker to stratify patients for targeted therapy treatment efficacy (**Fig. 4D**). To test the  
25 efficacy of PF-477736 *in vivo* we inoculated NOD/SCID mice with our A549 isogenic lines

1 subcutaneously and treated with PF477736 twice on indicated days. Unexpectedly, we  
2 observed decreased tumour growth in the LIMD1<sup>-/-</sup> tumours, which may represent difference  
3 between cell fitness during initial tumour implantation, as relative tumour growth was similar  
4 across lines (**Fig S4A-B**). Importantly, LIMD1 expressing tumours (LIMD1<sup>+/+</sup>) were unaffected by  
5 PF-477736 treatment *in vivo*, however we observed a significant decrease in tumour growth in  
6 the LIMD1<sup>-/-</sup> tumours upon treatment (**Fig. 4E, S4B**). Staining of these tumours with markers  
7 for cell proliferation (Ki67, **Fig. 4F**) and apoptosis (cleaved Caspase-3, **Fig. 4G**), revealed that  
8 PF-477736 selectively inhibits proliferation in LIMD1-deficient lung xenografts and increases  
9 apoptosis within these tumours, in agreement with our *in vitro* data.

10

11 To summarise our results, we have identified that the multi-kinase inhibitor PF-477736, by  
12 targeting multiple susceptibility pathways, selectively induces apoptosis in LIMD1<sup>-/-</sup> cells, whilst  
13 sparing LIMD1<sup>+/+</sup> cells. This is the first evidence supporting a targeted therapeutic approach for  
14 the treatment of a large proportion of lung cancers with LIMD1 loss.

15

## 16 Discussion

17 Lung cancer has a staggering disease burden, with a clear need for novel targeted therapies  
18 for larger patient populations. Loss of the tumour suppressor gene *LIMD1* is an attractive  
19 therapeutic option as we have identified copy number alterations in ~47% of lung  
20 adenocarcinoma patients [18]. Here we show a proof-of-concept study identifying PF-477736  
21 as a selective inhibitor of LIMD1 deficient cells (**Fig1**). Crucially, we observe a correlation with  
22 LIMD1 expression and drug sensitivity, indicating that we may be able to use LIMD1 expression  
23 as a biomarker for new targeted therapies and thus indicate potential responsive treatment  
24 efficacies.

25

1 PF477736 is a checkpoint kinase 1 (Chk1) inhibitor, however our results indicate a number of  
2 alternative kinases are potently inhibited *in vitro* and *in cellulo* by PF-477736 (**Fig. 3**). This  
3 finding is perhaps not surprising, as an expanding number of studies have shown that several  
4 ATP-pocket kinase inhibitors which have been used in clinical trials, exhibit off-target  
5 mechanisms of action distinct from the primary drug target [38]. Our data indicates potential  
6 targeting of multiple pathways is required for the treatment of LIMD1 deficient disease;  
7 previous work from our group and others have highlighted a number of pathways that LIMD1  
8 plays a crucial role in regulating [24, 39]. Therefore, it is unsurprising that targeting just one  
9 LIMD1-regulated pathway is insufficient to recapitulate PF-477736 induced cell death. Broad  
10 spectrum inhibitors have been crucial for targeting cancers, such as dual inhibition of PDGFRa  
11 and FGFR2 by pazopanib in SMARCB1 deficient rhabdoid tumors [40, 41]. This fits within our  
12 model of LIMD1 being a nodal gene, loss of which re-orchestrates numerous cellular pathways  
13 which requires inhibition of multiple kinases in order to induce cell death. For our analysis we  
14 focused on protein kinases as PF-477736 was designed as an inhibitor of the ATP moiety to  
15 block kinase function, however, there remains the possibility that PF-477736 is acting on a non-  
16 kinase enzyme or a kinase not covered by our analysis.

17

18 This proof-of-concept study has identified, for the first time, a selective inhibitor of LIMD1  
19 deficient cells. We have shown that it is possible to target these cells with a small molecule,  
20 allowing for the potential targeted treatment of a large proportion of lung cancer patients with  
21 LIMD1 deficient tumours. Targeting such deficient cancers is imperative, as LIMD1 loss has  
22 been further observed in breast, cervical, gastric, renal and head and neck cancers [42-47]. Our  
23 study has identified a novel therapeutic strategy based on LIMD1 status which exploits the loss  
24 of this tumour suppressor, offering the potential for targeted treatment for this large cancer  
25 patient population and significantly reduce disease burden worldwide.

## 1 **Materials and Methods**

### 2 **Cell Culture**

3 Cells were maintained in DMEM (HeLa, A549) or RPMI (HCC193, H1299, Hop62, H358, H838,  
4 H358M, H2887, H522, H322M, H23, MOR, H3122) (Sigma) supplemented with 10% FCS and  
5 1% Penicillin/Streptomycin solution in a humidified 37°C incubator with 5% CO<sub>2</sub>. SAEC were  
6 maintained in complete Airway Epithelial Cell Medium (ATCC). SAEC cells were immortalised  
7 using pFLRu-Bmi-1. All cell cultures are regularly tested for mycoplasma.

8

### 9 **Drug screening**

10 Cells were plated in 96-well plates at an optimised cell density, and after 24 hours treated  
11 with vehicle (0.01% DMSO) or the compound library at a final concentration of 1µM. Cells  
12 were dosed again after 48 hours. Cell viability was assessed using CellTitre-Glo (Promega)  
13 after 4 days of drug exposure, according to manufacturer's instructions. Luminescence  
14 readings from each well were log transformed and normalized according to the median signal  
15 on each plate and then standardized by Z-score statistic, using the median absolute deviation  
16 to estimate the variation in each screen. Z-scores were compared to identify compounds that  
17 cause selective loss of viability in LIMD1<sup>-/-</sup> cells compared to LIMD1<sup>+/+</sup> cells.

18

### 19 **Drug validation experiments**

20 PF477736 was purchased from Sigma-Aldrich. SCH900776, MK-2206, Go-6983, Silmitasertib  
21 was purchased from Selleckchem. In line with drug screen protocol, cells were seeded into a  
22 96-well plate and treated 24 hours later with a concentration range of drug, or DMSO control.  
23 Cells were re-dosed with drug after 48 hours and cell viability determined after 4 days of drug  
24 exposure using CellTitre Glo. MK-2206, Go-6983 and Silmitasertib were purchased from  
25 Sigma-Aldrich. For combination studies, SF<sub>80</sub> was calculated using the formula  $SF_{80} = (80 / (100 -$

1  $80)^{V_{Hill \text{ slope}}} \times SF_{50}$ . Cells were plated and dosed as above before measuring viability with  
2 CellTitre Glo.

3

#### 4 **Colony formation assay**

5 Cells were seeded at a low, colony forming density in a 6-well plate. 24 hours post seeding,  
6 cells were treated with drug or vehicle control. Drug containing media was refreshed every 2-  
7 3 days and cells were fixed in methanol after 10 days. Colonies were stained with 0.05%  
8 crystal violet and counted by eye.

9

#### 10 **Incucyte**

11 Growth curves were generated using the IncucyteZOOM live-cell imaging platform (Essen  
12 Bioscience). Cells were seeded into 96-well plates and were drugged 24 hours later with either  
13 1  $\mu$ M PF477736 or DMSO control. Images were captured at 10x magnification on the Incucyte  
14 every 2 hours. Drug was refreshed after 68 hours. Cell confluence per well was calculated  
15 using the IncucyteZOOM software (Essen Bioscience).

16

#### 17 **Protein analysis**

18 Cell pellets were lysed in RIPA buffer (150nM NaCl, 1% (v/v) IGEPAL, 0.5% (w/v) Deoxycholic  
19 acid, 0.1% (w/v) SDS, 50mM Tris) supplemented with Protease and Phosphatase inhibitors.  
20 Protein was quantified using the Pierce BCA protein assay kit (Thermo Fisher Scientific).  
21 Lysates were electrophoresed on acrylamide gels of appropriate acrylamide percentage,  
22 transferred onto PVDF membranes and immunoblotted using the following antibodies:  
23 LIMD1 (in house), B-actin (Sigma), Total PARP (CST), Cleaved PARP (CST), Chk1 (CST). Anti-IgG  
24 horseradish peroxidase (Dako) and chemiluminescent detection (Thermo Fisher Scientific)  
25 were used to develop immunoblots.

1  
2  
3  
4  
5  
6  
7  
8  
9  
10  
11  
12  
13  
14  
15  
16  
17  
18  
19  
20  
21  
22  
23  
24  
25

## **siRNA transfections**

siRNA targeting Chk1, CSNK2A1, AKT1, PKCA, PLK1 and non-targeting control were obtained as SMARTPools from Dharmacon. siRNAs were transfected using Lipofectamine RNAiMax (Invitrogen) according to manufacturer's instructions. 96-well plates were used for cell viability endpoints, and 12-well or 6-well plates were used for protein extraction for determination of protein knockdown by immunoblot.

## **Annexin V staining**

Cells were seeded into 10cm dishes at a density of  $1 \times 10^4$  cells/dish. 24 hours later dishes were treated with 1uM PF477736 or DMSO vehicle control. After 48 hours, cells were trypsinised and harvested (including those in media and PBS washes), counted and  $1 \times 10^6$  cells resuspended into 1x annexin-binding buffer (Thermo Fisher Scientific). 2ul Alexa Flour 488 Annexin V (Thermo Fisher Scientific) and 1ul 100ug/ml PI were added to each 100ul of cell suspension, and incubated for 15 minutes. Single stained and unstained controls were stained accordingly. Samples were run through the BD LSR Fortessa flow cytometer (Becton Dickinson, USA), recording 10,000 events for each sample. Data was analysed using FlowJo version 10 (FlowJo LLC).

## **Kinase profiling**

Kinase profiling was conducted by DiscoverX (USA). PF-477736 was dissolved in DMSO and diluted to 3mM (1000x screening concentration) for shipment. Profiling was performed by Discover X as per their in-house protocols.

## 1 **Phosphoproteomics**

2 Mass spectrometry analysis was conducted as described by Casado *et al.* (2018)[48]. Briefly,  
3 HeLa LIMD1<sup>+/+</sup> and LIMD1<sup>-/-</sup> were seeded into 10 cm dishes at 7 x 10<sup>5</sup> cells/dish. 48 hours post-  
4 seeding dishes were treated with either 1 μM PF477736 or DMSO vehicle control for 1 hour.  
5 Cells were washed 3x in ice-cold PBS containing protease and phosphatase inhibitors (1 mM  
6 NaF and 1 mM Na<sub>3</sub>VO<sub>4</sub>). Dishes were lysed in 200 μl of lysis buffer (8M Urea in 20 mM HEPES  
7 (pH 8.0) supplemented with, 1 mM Na<sub>3</sub>VO<sub>4</sub>, 1 mM NaF, 1 mM β-glycerol phosphate and 2.5  
8 mM Na<sub>2</sub>H<sub>2</sub>P<sub>2</sub>O<sub>7</sub>.) and cells scraped and transferred into Protein Lo-bind tubes (Eppendorf).  
9 Samples were sonicated for 10 cycles (30s on & 40s off) in a Diagenode Bioruptor® Plus.  
10 Samples were centrifuged at 20,000 xg for 10 minutes, 4°C and supernatant transferred to  
11 1.5 ml Protein Lo-bind tubes. BCA assay was conducted to quantify protein concentration.  
12 Protein suspensions of 400 μg of protein in a volume of 200 μL were subjected to cysteine  
13 reduction and alkylation using sequential incubation with 10 mM dithiothreitol (DDT) and  
14 16.6 mM iodoacetamide (IAM) for 1 h and 30 min, respectively, at 25°C with agitation. The  
15 urea concentration in the protein suspensions was reduced to 2 M by the addition of 600 μL  
16 of 20 mM HEPES (pH 8.0) and 100 μL of equilibrated trypsin beads were added and samples  
17 were incubated overnight at 37°C. Trypsin beads (50% slurry of TLCK-trypsin) were  
18 equilibrated with 3 washes with 20 mM HEPES (pH 8.0). The following day, trypsin beads were  
19 removed by centrifugation (2,000 xg at 5°C for 5 min) and samples were desalted using Oasis  
20 HLB cartridges (Waters).  
21 Briefly, cartridges set in a vacuum manifold device, with a pressure adjusted to 5 mmHg, were  
22 conditioned with 1 mL acetonitrile (ACN) and equilibrated with 1.5 mL of wash solution (0.1%  
23 trifluoroacetic acid (TFA), 2% ACN). Then, peptide solutions were loaded into the cartridges  
24 and washed twice with 1 mL of wash solution. Peptides were eluted with 0.5 mL of glycolic  
25 acid buffer A (1 M glycolic acid, 5% TFA, 50% ACN).



1 For phosphopeptide enrichment, eluents were normalized to 1 mL with glycolic acid buffer B  
2 (1 M glycolic acid, 5% TFA, 80% ACN) and incubated with 25  $\mu$ L of TiO<sub>2</sub> solution (500 mg TiO<sub>2</sub>  
3 beads in 500  $\mu$ L of 1% TFA) for 5 min at room temperature. TiO<sub>2</sub> beads were packed by  
4 centrifugation into empty spin columns previously washed with ACN. TiO<sub>2</sub> bead pellets were  
5 sequentially washed by centrifugation (1500 xg for 3 min) with 100  $\mu$ L of glycolic acid buffer  
6 B, ammonium acetate buffer (100 mM ammonium acetate in 25% ACN) and twice with  
7 neutral solution (10% ACN). Spin tips were transferred to fresh tubes and phosphopeptides  
8 were eluted by adding 50  $\mu$ L of elution solution (5% NH<sub>4</sub>OH, 7.5% ACN) and centrifuging the  
9 spin-tips at 1500 xg for 3 min. This elution step was repeated a total of 4 times. Finally,  
10 samples were frozen in dry ice for 15 min, dried in a SpeedVac vacuum concentrator and  
11 stored at -80°C.

12 Peptide pellets were reconstituted in 13  $\mu$ L of reconstitution buffer (20 fmol/ $\mu$ L enolase in 3%  
13 ACN, 0.1% TFA) and 5  $\mu$ L were loaded twice onto an LC-MS/MS system consisted of a Dionex  
14 UltiMate 3000 RSLC coupled to Q Exactive™ Plus Orbitrap Mass Spectrometer (Thermo Fisher  
15 Scientific) through an EASY-Spray source. Chromatographic separation of the peptides was  
16 performed using the mobile phases A (3% ACN; 0.1% FA) and B (99.9% ACN; 0.1% FA).  
17 Peptides were loaded in a  $\mu$ -pre-column and separated in an analytical column using a  
18 gradient running from 3% to 23% B over 60 min. The UPLC system delivered a flow of 2  $\mu$ L/min  
19 (loading) and 250 nL/min (gradient elution). The Q Exactive Plus operated a duty cycle of 2.1s.  
20 Thus, it acquired full scan survey spectra (m/z 375–1500) with a 70,000 FWHM resolution  
21 followed by data-dependent acquisition in which the 15 most intense ions were selected for  
22 HCD (higher energy collisional dissociation) and MS/MS scanning (200–2000 m/z) with a  
23 resolution of 17,500 FWHM. A dynamic exclusion period of 30s was enabled with m/z window  
24 of  $\pm$ 10 ppm.

1 Peptide identification was automated using Mascot Daemon 2.6.0. Thus, Mascot Distiller  
2 v2.6.1.0 generated peak list files (MGFs) from RAW data and Mascot search engine (v2.6)  
3 matched the MS/MS data stored in the MGF files to peptides using the SwissProt Database  
4 (SwissProt\_2016Oct.fasta). Searches had a FDR of ~1% and allowed 2 trypsin missed  
5 cleavages, mass tolerance of  $\pm 10$  ppm for the MS scans and  $\pm 25$  mmu for the MS/MS scans,  
6 carbamidomethyl Cys as a fixed modification and PyroGlu on N-terminal Gln, oxidation of Met  
7 and phosphorylation on Ser, Thr, and Tyr as variable modifications.

8 A label free procedure based on extracted ion chromatograms (XICs) quantified all Identified  
9 peptides. Missing data points were minimized by constructing XICs across all LC-MS/MS runs  
10 for all the peptides identified in at least one of the LC-MS/MS runs [49]. XIC mass and  
11 retention time windows were  $\pm 7$  ppm and  $\pm 2$  min, respectively. Quantification of peptides  
12 was achieved by measuring the area under the peak of the XICs. Individual peptide intensity  
13 values in each sample were normalized to the sum of the intensity values of all the peptides  
14 quantified in that sample. Data points not quantified for a particular peptide were given a  
15 peptide intensity value equal to the minimum intensity value quantified in the sample divided  
16 by 10. Significant differences in phosphopeptide intensities were assessed by student's t test  
17 with Benjamini Hochberg multiple testing correction (false discovery rate).

18

### 19 **Kinase-Substrate Enrichment Analysis (KSEA)**

20 Kinase-substrate enrichment analysis (KSEA) was conducted as previously described by  
21 Casado *et al.* (2013). Briefly, phosphopeptides with a  $p < 0.05$  (assessed by t test of  $\log_2$ -  
22 transformed data) were grouped into substrate sets based on the PhosphoSite database. The  
23 'enrichment' method was used to infer differences in the abundance of substrate groups  
24 across samples. Z-score was calculated using the formula ( $Z\text{-score} = (mS - mP) * m^{1/2} / \delta$ ) where

1 m is the size of the substrate group and  $\delta$  is the standard deviation of the mean abundance  
2 across the whole dataset. Z-score was converted to a p value in Excel.

3 The mass spectrometry phosphoproteomics and proteomics data generated during this study  
4 have been deposited to the ProteomeXchange Consortium via the PRIDE partner repository  
5 with the dataset identifier PXD023674.

6

### 7 **Immunohistochemistry and scoring**

8 Formalin fixed paraffin embedded (FFPE) mouse tumours were sliced into 4 $\mu$ m-thick sections.  
9 Slides were baked overnight at 57C prior to dewaxing. Afterwards slides were put into xylene,  
10 100% ethanol and in 3% H<sub>2</sub>O<sub>2</sub>/Methanol solution for 10 minutes for endogenous peroxidase  
11 inactivation. Antigen retrieval for Ki67 and Cleaved caspase-3 was done using a 10mM citrate  
12 buffer (pH 6) for 10 minutes at high power (700W) in a microwave. Samples were left at RT  
13 for 30 mins and blocked in 10% goat serum for 20 minutes. Primary antibodies (Ki67 Abcam  
14 ab16667, Cleaved caspase-3 Cell signalling #9661) were applied at a 1:100 dilution and left  
15 incubating 1h at RT (Ki67) or overnight at 4C (Cleaved caspase-3). Anti-rabbit biotinylated  
16 secondary antibody (Vector laboratories BA-1000-1.5) was added at a 1:200 dilution for 30  
17 minutes at RT. Samples were incubated with ABC reagent (Vector laboratories PK-6100) for  
18 20 minutes at RT. Afterwards slides were developed with DAB solution (Dako K3468) for 5  
19 minutes. Washes with PBS (2x, 2 minutes each) were carried out every time slides were  
20 incubated with a different reagent.

21 Finally, samples were counterstained with Haematoxylin, differentiated in 1% acid alcohol,  
22 dehydrated in 70%, 90% and 100% ethanol, cleared in xylene and mount using DPX mounting  
23 medium. Slides were imaged using the PANNORAMIC 250 Flash III scanner (3D Histech).

24

1 For the scoring, ten 50x fields were selected at random so that the tumour regions within  
2 the xenograph were uniformly covered. Cleaved caspase-3 stained samples presented a  
3 highly apoptotic area at the interphase of the tumour and the stromal regions. Cleaved  
4 caspase-3 staining was strong in this area for all samples (regardless of the cell type or the  
5 treatment) and was therefore, excluded from the quantifications. For Ki67, the quantification  
6 fields were imported into QuPath software and the positive cell detection feature was used  
7 to detect the total number of cells, the number of DAB positive and negative cells. For Cleaved  
8 caspase-3, ImageJ was used and positive Cleaved caspase-3 cells were manually  
9 counted using the Cell Counter plugin. Early and late apoptotic cells were counted. Criteria  
10 for considering a Cleaved caspase-3 positive cell was that the DAB signal should show a  
11 defined shape and colocalise with Hematoxylin (presence of a nucleus). In some cases, a cell  
12 was included where more than one nuclei was observed (late apoptosis).

13

#### 14 **Subcutaneous Xenograft study**

15 6 weeks old female NOD-SCID mice were purchased from Charles River and housed with food  
16 and water ad libitum, five animals were kept in each cage. A549 LIMD1<sup>-/-</sup> and LIMD1<sup>+/+</sup> were  
17 grown until reaching the beginning of the exponential growth phase and then detached and  
18 resuspended in Matrigel 5mg/ml (Sigma). 1x10<sup>6</sup> cells in 100 µl of Matrigel were injected  
19 subcutaneously into the mice, 20 with A549 LIMD1<sup>-/-</sup> and 20 with A549 LIMD<sup>+/+</sup>. Tumour  
20 growth was measured every two days using callipers and the tumour size calculated using the  
21 formula  $V = (\text{length}^2 \times \text{width})/2$ . Once the average tumour size was between 150 and 200mm<sup>3</sup>,  
22 each group was further divided into two groups and once a week received either PF-477736  
23 (7.5mg/kg per dose) or vehicle twice in a day with 6 hours difference. The vehicle contained  
24 50 nM sodium acetate and 4% dextrose, pH 4 (Sigma). Tumour size and mice weight were  
25 monitored three times per week and the experiment was stopped when the tumour size

1 exceeded 1.44cm<sup>3</sup>. Mice were then culled and the tumours harvested, sectioned  
2 longitudinally and each section was fixed in 10% neutral buffered formalin.

### 3 *Statistical analysis*

4 Data was normalized to relevant controls as required. Statistical analysis was conducted using  
5 GraphPad Prism 8.0, using the appropriate statistical test for the number of groups and type  
6 of data generated from the experiment. Figure legends detail statistical tests used in individual  
7 experiments. Statistical significance is shown using the following nomenclature: ns p>0.05,  
8 \*p≤0.05, \*\*p≤0.01, \*\*\*p≤0.001.

9

### 10 **AUTHOR CONTRIBUTIONS**

11 KMD, PG, MFCG, KSB, MH, KS, FKM, MS, RB, PCI, PRC, SAM and TVS designed and performed  
12 experiments and analysed the data. All authors contributed to editing and proofreading of the  
13 manuscript. KMD, PG, SAM and TVS wrote the manuscript. SAM and TVS supervised and  
14 managed all research.

15

### 16 **ACKNOWLEDGMENTS.**

17 We thank Julian Blagg, Michelle Garrett, Paul A. Clarke and Dimitris Logos for advice on the  
18 study.

19

20

### 21 **FUNDING**

1 The research performed in this study was funded by the following research grants award to  
2 T.V.S. Medical Research Council ([MR/N009185/1](#)) and Barts Charity grants (MGU0490 and  
3 MGU0358). All research conducted within the CRUK Barts Centre is support by Infrastructure  
4 grant from CRUK (C355/A25137) and the CRUK City of London Major Centre Award  
5 (C7893/A26233).  
6

1

2 **Figure 1 PF-477736 is a selective inhibitor of LIMD1 deficient cells. A)** Waterfall plot of DZ-  
3 Scores from compound library screen. Isogenic LIMD1<sup>-/-</sup> and control lines were treated with a  
4 1 mM dose and cell viability measured after 4 days (n = 3). **B-C)** Immunoblot of CRISPR-Cas9  
5 generated LIMD1<sup>-/-</sup> cell lines in HeLa and A549. **D-E)** Dose response curves of PF-477736 in  
6 A549 and HeLa isogenic LIMD1<sup>-/-</sup> lines. Cells were drugged twice over 4 days before measuring  
7 cell viability and calculating Surviving Fraction (n = 3). **F)** Growth of HeLa isogenic LIMD1<sup>-/-</sup>  
8 measured using Incucyte Zoom following 1 mM treatment with PF477736 (n = 3; one-way  
9 ANOVA comparing AUC for each curve). **G-H)** Colony formation assay of HeLa isogenic LIMD1<sup>-/-</sup>  
10 <sup>-/-</sup> cells following treatment of PF-477736 for 10 days. Cells were treated every 2-3 days with  
11 indicated concentration of PF-477736 before fixation and staining (n = 3, two-way ANOVA). **I-**  
12 **J)** Western blot densitometry quantifying PARP cleavage in HeLa isogenic LIMD1<sup>-/-</sup> lines treated  
13 with PF-477736 for 48 hours. (n = 3, two-way ANOVA). ns p>0.05, \*p≤0.05, \*\*p≤0.01,  
14 \*\*\*p≤0.001.

15

16 **Figure S1 PF-477736 is a selective inhibitor of LIMD1 deficient cells. A-B)** SF<sub>50</sub> values of  
17 PF477736 in A549 and HeLa isogenic LIMD1<sup>-/-</sup> lines (n = 3, one-way ANOVA). **C)** Bright field  
18 images of cells upon 48 hours of PF477736 treatment (scale bar = 100 μm, representative  
19 images from n = 3). **D)** Bar chart and contour plots of Annexin V/PI staining in HeLa isogenic  
20 LIMD1<sup>-/-</sup> lines. Cells were treated for 48 hours at 1 mM dose of PF477736 before staining and  
21 analysis by flow cytometry (n = 3). ns p>0.05, \*p≤0.05, \*\*p≤0.01, \*\*\*p≤0.001, \*\*\*\* p<0.0001.

22

23

24 **Figure 2 PF-477736 selectively kills LIMD1<sup>-/-</sup> cells independent of Chk1 inhibition. A)** Dose  
25 response curve of SCH900776 in HeLa isogenic LIMD1<sup>-/-</sup> lines. Cells were treated for 4 days

1 before measuring viability and calculating surviving fraction (n = 3). **B)** Bar chart of SF<sub>50</sub> values  
2 from panel A (n = 3, one-way ANOVA). **C)** Surviving fraction of HeLa isogenic LIMD1<sup>-/-</sup> lines  
3 transfected with siRNA against *CHEK1* at 50 nM and 20 nM for 72 hours (n=3, two-way ANOVA)  
4 ns p>0.05. **D)** Immunoblot of Chk1 and LIMD1 in HeLa isogenic LIMD1<sup>-/-</sup> lines transfected with  
5 siRNA against *CHEK1* (20nM, 72 hours) (n=3).

6

7 **Figure S2 P—477736 selectively kills LIMD1<sup>-/-</sup> cells independent of Chk1 inhibition.** **A)** Alternative  
8 Chk1 inhibitors from drug screen in Figure 1A. Surviving fraction determined following 5 days  
9 treatment at 1μM.

10

11 **Figure 3 PF-477736 is a broad-spectrum kinase inhibitor that elicits LIMD1<sup>-/-</sup> specific cellular**  
12 **changes in the phosphoproteome.** **A)** Heatmap showing remaining kinase activity of a panel of  
13 in vitro kinases upon 3 mM PF477736 treatment in DiscoverX KINOMEscan assay. **B)** Venn  
14 diagram representing the proportion and number of kinases inhibited to less than 35%, 10%  
15 and 1% of control activity. **C)** Waterfall plot of kinases most inhibited by PF477736 (3 mM) in  
16 the *in vitro* kinase assay. **D)** Volcano plot of phosphosite changes between 1μM PF477736  
17 treated and DMSO control lysates in isogenic HeLa lines. Cells were harvested following 1 hour  
18 drug treatment. No significant phosphosite changes were induced by PF477736 in the LIMD1<sup>+/+</sup>  
19 cell line, compared with 54 reduced and 119 increased phosphosites in the LIMD1<sup>-/-</sup> cell line.  
20 Cut off point for statistically significant phosphosite is a false discovery rate of > 0.05 and s0 of  
21 0.01. (n = 3). **E)** Kinase Substrate Enrichment Analysis (KSEA) of phosphoproteomics shows  
22 kinases significantly affected by PF477736 treatment in LIMD1<sup>+/+</sup> (grey) or LIMD1<sup>-/-</sup> cells.  
23 \*p≤0.05, \*\*p≤0.01, \*\*\*p≤0.001

24



1 **Figure S3 PF-477736 is a broad-spectrum kinase inhibitor that elicits LIMD1<sup>-/-</sup> specific cellular**  
2 **changes in the phosphoproteome. A-B)** PCA analysis on phosphoproteome changes shows no  
3 separation between treated and untreated samples in LIMD1<sup>+/+</sup> cells, but a clear separation  
4 in LIMD1<sup>-/-</sup> cells. Cell viability of HeLa isogenic LIMD1<sup>-/-</sup> lines treated with siRNA against  
5 *CSNK2A1*, *AKT1* and *PKCA*. Viability was measured 120 hours post transfection and surviving  
6 fractions were calculated (n = 3). **B)** Dose response curves of indicated inhibitors in HeLa  
7 LIMD1<sup>+/+</sup> line (n = 2). **C)** Cell viability of HeLa isogenic LIMD1<sup>-/-</sup> lines treated with inhibitors in  
8 combination at their SF<sub>80</sub> values based upon dose response curves in panel B and PF-477736  
9 at 1 mM as positive control (n = 3, two-way ANOVA). ns p>0.05 \*p≤0.05, \*\*p≤0.01, \*\*\*p≤0.001

10

11 **Figure 4 PF-477736 treatment is proof-of-concept inhibitor of LIMD1 deficient lung cancers.**

12 **A)** Immunoblot of isogenic LIMD1<sup>mut</sup> Small Airway Epithelial cells and control. **B)** Dose  
13 response of PF-477736 in isogenic LIMD1<sup>mut</sup> Small Airway Epithelial cells. Cells were treated  
14 twice prior to measuring cell viability and calculating surviving fraction (n = 3). **C)** Immunoblot  
15 of LIMD1 in a panel of lung adenocarcinoma cell lines (representative blot from n = 3). **D)**  
16 Pearson's correlation coefficient between LIMD1 protein expression and surviving fraction of  
17 indicated cell line after treatment with 1 mM PF477736. **E)** Tumour growth of subcutaneous  
18 A549 isogenic LIMD1<sup>-/-</sup> xenografts implanted into the flank of NOD/SCID mice. Mice were  
19 treated twice on indicated days with vehicle or PF477736 (7.5 mg/kg) (n = 10 per group). **F-G)**  
20 Immunohistochemical staining and scoring of Ki67 (**F)** and Cleaved Caspase-3 (**G)** in mouse  
21 xenograft tumours. (n = 10 per group, two-way ANOVA)

22

23 **Figure S4 PF-477736 treatment is proof-of-concept inhibitor of LIMD1 deficient lung cancers.**

24 **A)** Relative tumour size of vehicle treated xenografts from Fig. 4E normalized to first tumour  
25 measurement (n = 10 per group, two-way ANOVA). **B)** Tumour volume of xenografts at day 29

- 1 (n = 10 per group, two-way ANOVA). **C-D**) Example staining of Ki67 and Cleaved Caspase-3 in
- 2 xenografts. Arrows in panel D indicate cleaved caspase-3 positive cells.
- 3

## 1 **References**

- 2 1. Ferlay, J., et al., *Estimating the global cancer incidence and mortality in 2018: GLOBOCAN sources and methods*. Int J Cancer, 2019. **144**(8): p. 1941-1953.
- 3
- 4 2. Institute, N.C., *SEER Cancer Stat Facts: Lung and bronchus cancer*. . 2019.
- 5 3. Zhou, F., M. Qiao, and C. Zhou, *The cutting-edge progress of immune-checkpoint blockade in lung cancer*. Cell Mol Immunol, 2020.
- 6
- 7 4. Kalbasi, A. and A. Ribas, *Tumour-intrinsic resistance to immune checkpoint blockade*. Nat Rev Immunol, 2020. **20**(1): p. 25-39.
- 8
- 9 5. Herbst, R.S., D. Morgensztern, and C. Boshoff, *The biology and management of non-small cell lung cancer*. Nature, 2018. **553**(7689): p. 446-454.
- 10
- 11 6. Halliday, P.R., C.M. Blakely, and T.G. Bivona, *Emerging Targeted Therapies for the Treatment of Non-small Cell Lung Cancer*. Curr Oncol Rep, 2019. **21**(3): p. 21.
- 12
- 13 7. Smyth, M.J., et al., *Combination cancer immunotherapies tailored to the tumour microenvironment*. Nat Rev Clin Oncol, 2016. **13**(3): p. 143-58.
- 14
- 15 8. Nishino, M., et al., *Monitoring immune-checkpoint blockade: response evaluation and biomarker development*. Nat Rev Clin Oncol, 2017. **14**(11): p. 655-668.
- 16
- 17 9. Topalian, S.L., et al., *Five-Year Survival and Correlates Among Patients With Advanced Melanoma, Renal Cell Carcinoma, or Non-Small Cell Lung Cancer Treated With Nivolumab*. JAMA Oncol, 2019.
- 18
- 19
- 20 10. Vokes, E.E., et al., *Nivolumab versus docetaxel in previously treated advanced non-small-cell lung cancer (CheckMate 017 and CheckMate 057): 3-year update and outcomes in patients with liver metastases*. Ann Oncol, 2018. **29**(4): p. 959-965.
- 21
- 22
- 23 11. Reck, M., et al., *Pembrolizumab versus Chemotherapy for PD-L1-Positive Non-Small-Cell Lung Cancer*. N Engl J Med, 2016. **375**(19): p. 1823-1833.
- 24
- 25 12. Gettinger, S., et al., *Five-Year Follow-Up of Nivolumab in Previously Treated Advanced Non-Small-Cell Lung Cancer: Results From the CA209-003 Study*. J Clin Oncol, 2018. **36**(17): p. 1675-1684.
- 26
- 27
- 28 13. Yuan, M., et al., *The emerging treatment landscape of targeted therapy in non-small-cell lung cancer*. Signal Transduct Target Ther, 2019. **4**: p. 61.
- 29
- 30 14. Teixeira, V.H., et al., *Deciphering the genomic, epigenomic, and transcriptomic landscapes of pre-invasive lung cancer lesions*. Nat Med, 2019. **25**(3): p. 517-525.
- 31
- 32 15. Jamal-Hanjani, M., et al., *Tracking the Evolution of Non-Small-Cell Lung Cancer*. N Engl J Med, 2017. **376**(22): p. 2109-2121.
- 33

- 1 16. Biswas, D., et al., *A clonal expression biomarker associates with lung cancer mortality.*  
2 Nat Med, 2019. **25**(10): p. 1540-1548.
- 3 17. Lopez, S., et al., *Interplay between whole-genome doubling and the accumulation of*  
4 *deleterious alterations in cancer evolution.* Nat Genet, 2020. **52**(3): p. 283-293.
- 5 18. Foxler, D.E., et al., *A HIF-LIMD1 negative feedback mechanism mitigates the pro-*  
6 *tumorigenic effects of hypoxia.* EMBO Mol Med, 2018.
- 7 19. Sharp, T.V., et al., *The chromosome 3p21.3-encoded gene, LIMD1, is a critical tumor*  
8 *suppressor involved in human lung cancer development.* Proc Natl Acad Sci U S A, 2008.  
9 **105**(50): p. 19932-7.
- 10 20. Kadrmas, J.L. and M.C. Beckerle, *The LIM domain: from the cytoskeleton to the*  
11 *nucleus.* Nat Rev Mol Cell Biol, 2004. **5**(11): p. 920-31.
- 12 21. Sharp, T.V., et al., *LIM domains-containing protein 1 (LIMD1), a tumor suppressor*  
13 *encoded at chromosome 3p21.3, binds pRB and represses E2F-driven transcription.*  
14 Proc Natl Acad Sci U S A, 2004. **101**(47): p. 16531-6.
- 15 22. James, V., et al., *LIM-domain proteins, LIMD1, Ajuba, and WTIP are required for*  
16 *microRNA-mediated gene silencing.* Proc Natl Acad Sci U S A, 2010. **107**(28): p. 12499-  
17 504.
- 18 23. Foxler, D.E., et al., *The LIMD1 protein bridges an association between the prolyl*  
19 *hydroxylases and VHL to repress HIF-1 activity.* Nat Cell Biol, 2012. **14**(2): p. 201-8.
- 20 24. Bridge, K.S., et al., *Argonaute Utilization for miRNA Silencing Is Determined by*  
21 *Phosphorylation-Dependent Recruitment of LIM-Domain-Containing Proteins.* Cell  
22 Rep, 2017. **20**(1): p. 173-187.
- 23 25. Das Thakur, M., et al., *Ajuba LIM proteins are negative regulators of the Hippo*  
24 *signaling pathway.* Curr Biol, 2010. **20**(7): p. 657-62.
- 25 26. Codelia, V.A., G. Sun, and K.D. Irvine, *Regulation of YAP by mechanical strain through*  
26 *Jnk and Hippo signaling.* Curr Biol, 2014. **24**(17): p. 2012-7.
- 27 27. Hou, Z., et al., *The LIM protein AJUBA recruits protein arginine methyltransferase 5 to*  
28 *mediate SNAIL-dependent transcriptional repression.* Mol Cell Biol, 2008. **28**(10): p.  
29 3198-207.
- 30 28. Langer, E.M., et al., *Ajuba LIM proteins are snail/slug corepressors required for neural*  
31 *crest development in Xenopus.* Dev Cell, 2008. **14**(3): p. 424-36.
- 32 29. Luderer, H.F., S. Bai, and G.D. Longmore, *The LIM protein LIMD1 influences osteoblast*  
33 *differentiation and function.* Exp Cell Res, 2008. **314**(15): p. 2884-94.

- 1 30. Zhang, C.S., et al., *RHOBTB3 promotes proteasomal degradation of HIFalpha through*  
2 *facilitating hydroxylation and suppresses the Warburg effect*. Cell Res, 2015. **25**(9): p.  
3 1025-42.
- 4 31. Farmer, H., et al., *Targeting the DNA repair defect in BRCA mutant cells as a*  
5 *therapeutic strategy*. Nature, 2005. **434**(7035): p. 917-21.
- 6 32. Usha, T., et al., *Drug Repurposing Approaches: Existing Leads For Novel Threats And*  
7 *Drug Targets*. Curr Protein Pept Sci, 2020.
- 8 33. Acar, A., et al., *Exploiting evolutionary steering to induce collateral drug sensitivity in*  
9 *cancer*. Nat Commun, 2020. **11**(1): p. 1923.
- 10 34. Lampis, A., et al., *MIR21 Drives Resistance to Heat Shock Protein 90 Inhibition in*  
11 *Cholangiocarcinoma*. Gastroenterology, 2018. **154**(4): p. 1066-1079.e5.
- 12 35. Blasina, A., et al., *Breaching the DNA damage checkpoint via PF-00477736, a novel*  
13 *small-molecule inhibitor of checkpoint kinase 1*. Mol Cancer Ther, 2008. **7**(8): p. 2394-  
14 404.
- 15 36. Jacoby, E., et al., *Extending kinome coverage by analysis of kinase inhibitor broad*  
16 *profiling data*. Drug Discov Today, 2015. **20**(6): p. 652-8.
- 17 37. Casado, P., et al., *Phosphoproteomics data classify hematological cancer cell lines*  
18 *according to tumor type and sensitivity to kinase inhibitors*. Genome Biol, 2013. **14**(4):  
19 p. R37.
- 20 38. Lin, A., et al., *Off-target toxicity is a common mechanism of action of cancer drugs*  
21 *undergoing clinical trials*. Sci Transl Med, 2019. **11**(509).
- 22 39. Foxler, D.E., et al., *A HIF-LIMD1 negative feedback mechanism mitigates the pro-*  
23 *tumorigenic effects of hypoxia*. 2018.
- 24 40. Chauvin, C., et al., *High-Throughput Drug Screening Identifies Pazopanib and Clofilium*  
25 *Tosylate as Promising Treatments for Malignant Rhabdoid Tumors*. Cell Rep, 2017.  
26 **21**(7): p. 1737-1745.
- 27 41. Lang, J.D., et al., *Ponatinib Shows Potent Antitumor Activity in Small Cell Carcinoma of*  
28 *the Ovary Hypercalcemic Type (SCCOHT) through Multikinase Inhibition*. Clin Cancer  
29 Res, 2018. **24**(8): p. 1932-1943.
- 30 42. Spendlove, I., et al., *Differential subcellular localisation of the tumour suppressor*  
31 *protein LIMD1 in breast cancer correlates with patient survival*. Int J Cancer, 2008.  
32 **123**(10): p. 2247-53.

- 1 43. Ghosh, S., et al., *LIMD1 is more frequently altered than RB1 in head and neck*  
2 *squamous cell carcinoma: clinical and prognostic implications*. Mol Cancer, 2010. **9**: p.  
3 58.
- 4 44. Sarkar, S., et al., *Differential molecular signature alterations of RBSP3, LIMD1 and*  
5 *CDC25A in normal oral epithelium during oral tumorigenesis*. Biosci Rep, 2016.
- 6 45. Chakraborty, C., et al., *Deregulation of LIMD1-VHL-HIF-1alpha-VEGF pathway is*  
7 *associated with different stages of cervical cancer*. Biochem J, 2018. **475**(10): p. 1793-  
8 1806.
- 9 46. Zhang, D., et al., *LIMD1 is a survival prognostic marker of gastric cancer and hinders*  
10 *tumor progression by suppressing activation of YAP1*. Cancer Manag Res, 2018. **10**: p.  
11 4349-4361.
- 12 47. Sur, S., et al., *Over expression of HIF1alpha is associated with inactivation of both*  
13 *LimD1 and VHL in renal cell carcinoma: Clinical importance*. Pathol Res Pract, 2017.  
14 **213**(12): p. 1477-1481.
- 15 48. Casado, P., et al., *Proteomic and genomic integration identifies kinase and*  
16 *differentiation determinants of kinase inhibitor sensitivity in leukemia cells*. Leukemia,  
17 2018. **32**(8): p. 1818-1822.
- 18 49. Dermit, M., et al., *Oxidative stress downstream of mTORC1 but not AKT causes a*  
19 *proliferative defect in cancer cells resistant to PI3K inhibition*. Oncogene, 2017. **36**(19):  
20 p. 2762-2774.

21

22

23

24

25

26

27

28

29

30

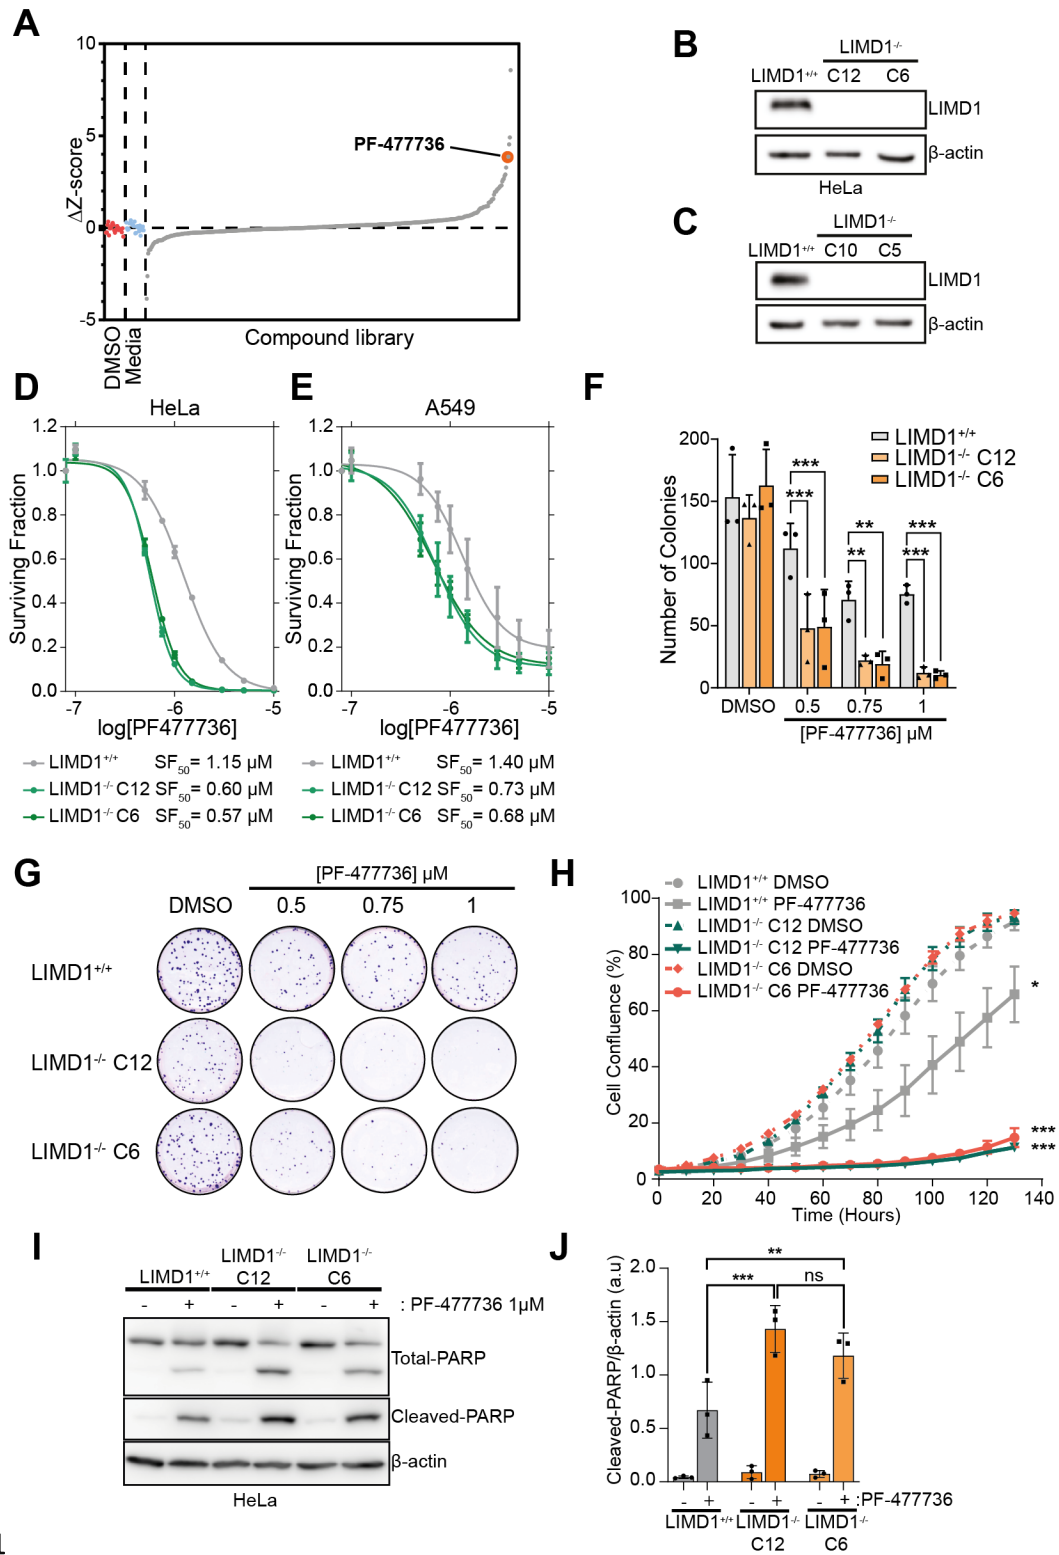

1 Figure 1

2

3

4

5

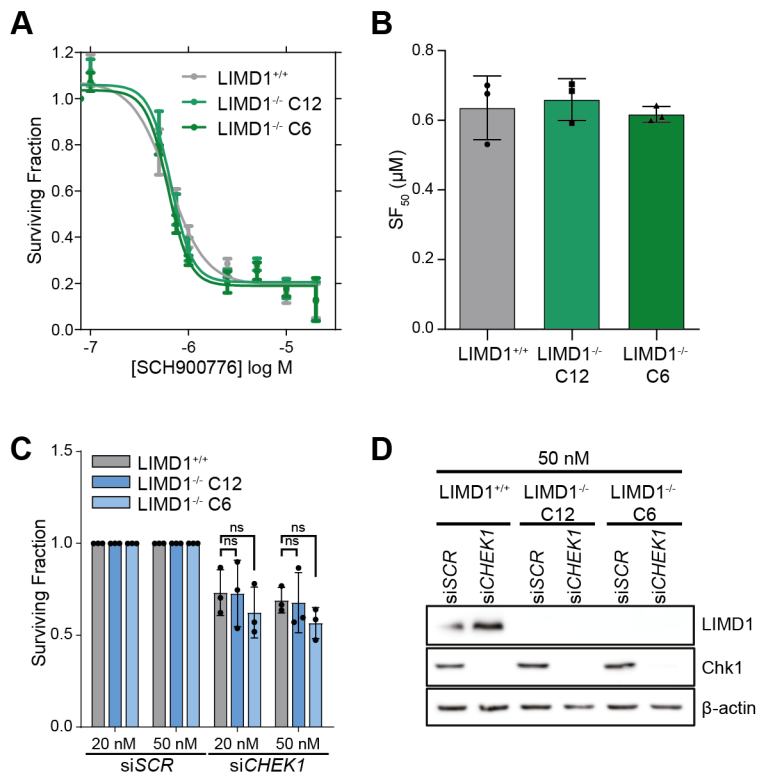

1

2 Figure 2

3

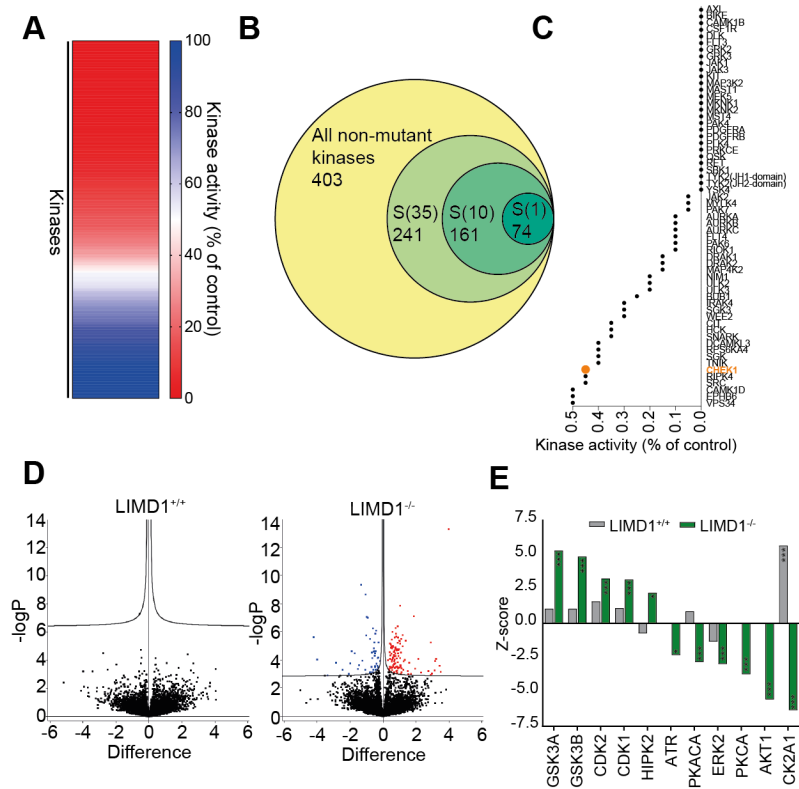

4

5 Figure 3

6



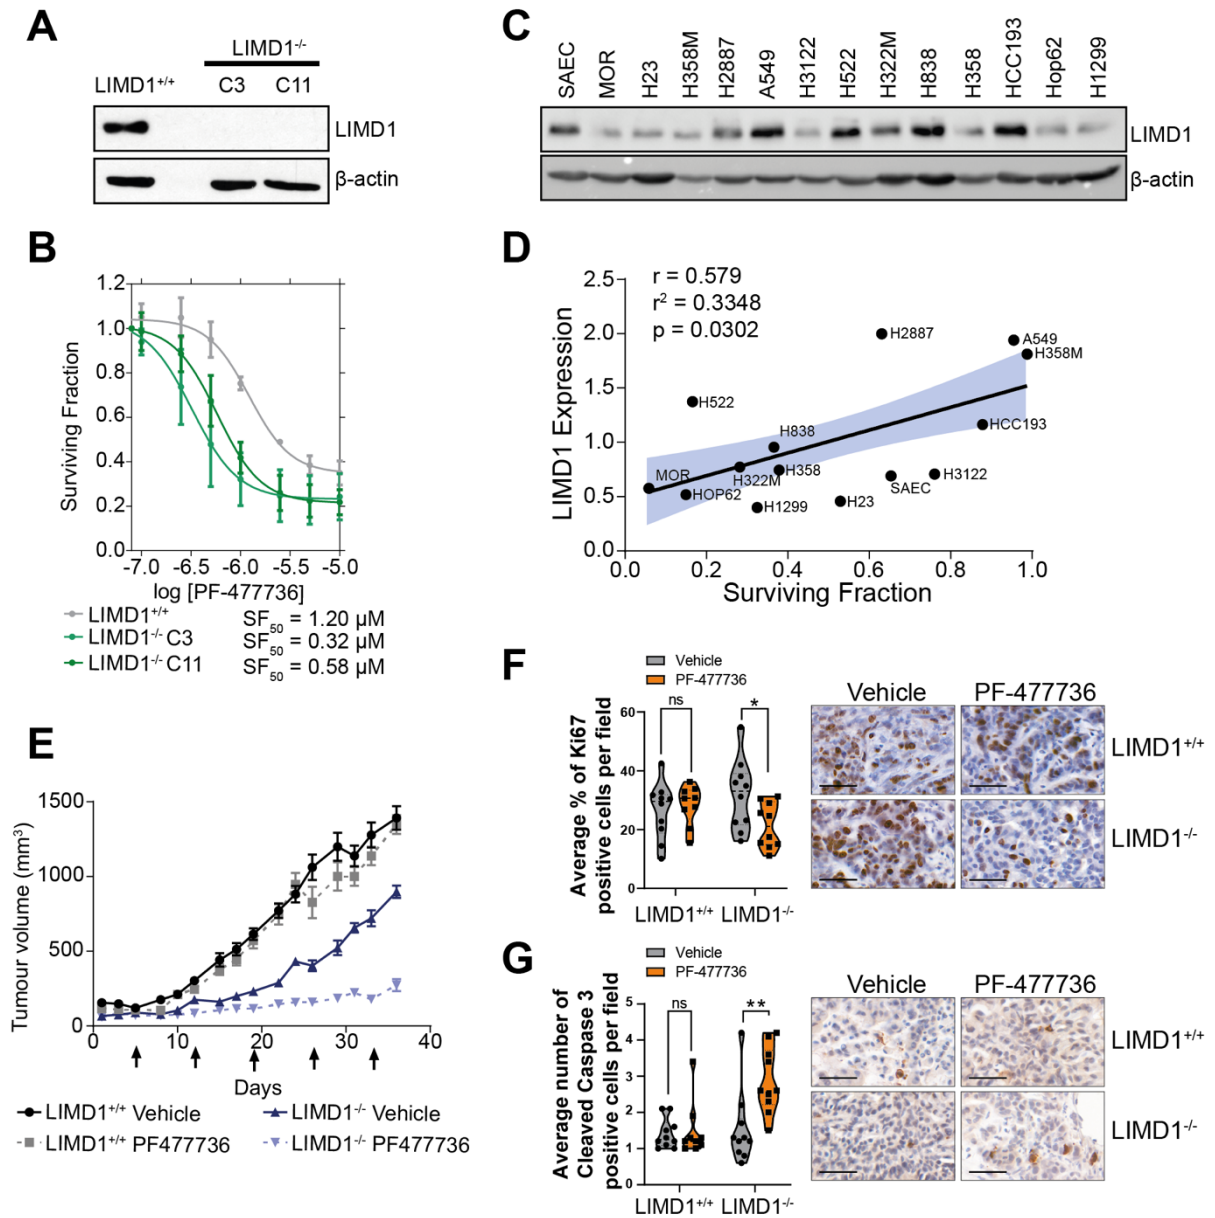

Figure 4

1

2

3

4

5

6

7

8

9

10

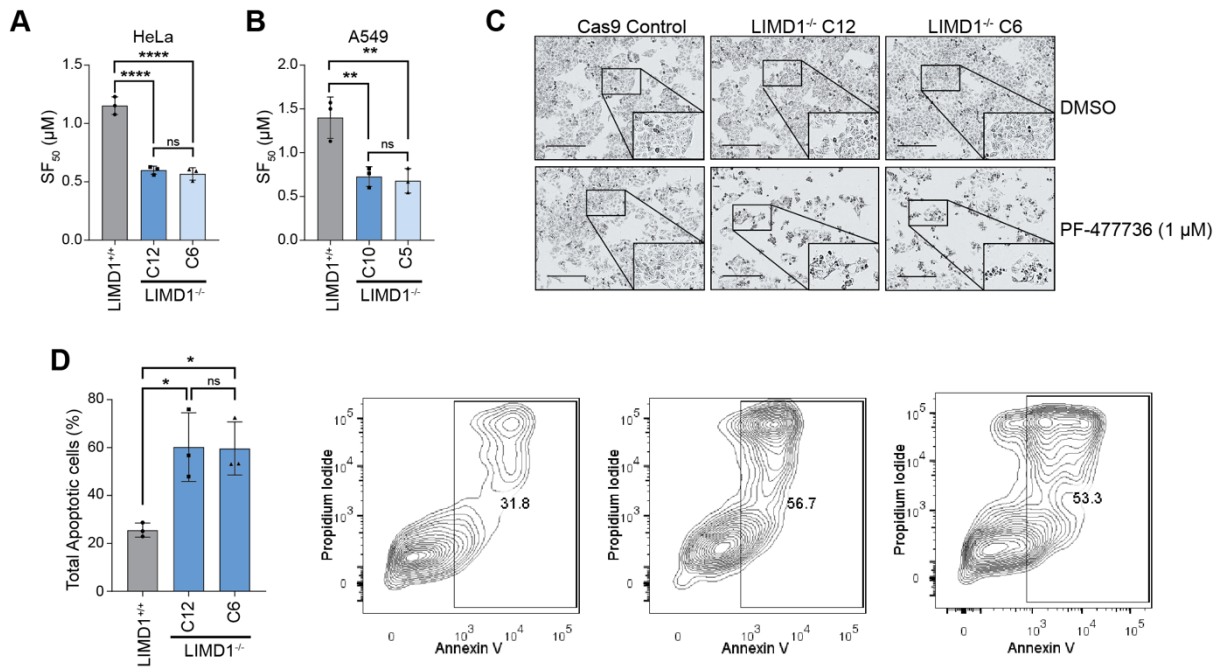

1

2 Figure S1

3

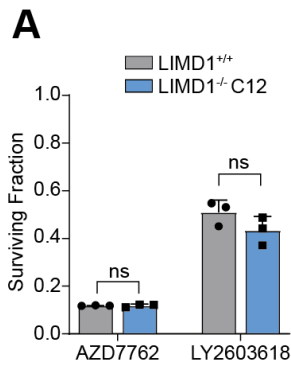

4

5 Figure S2

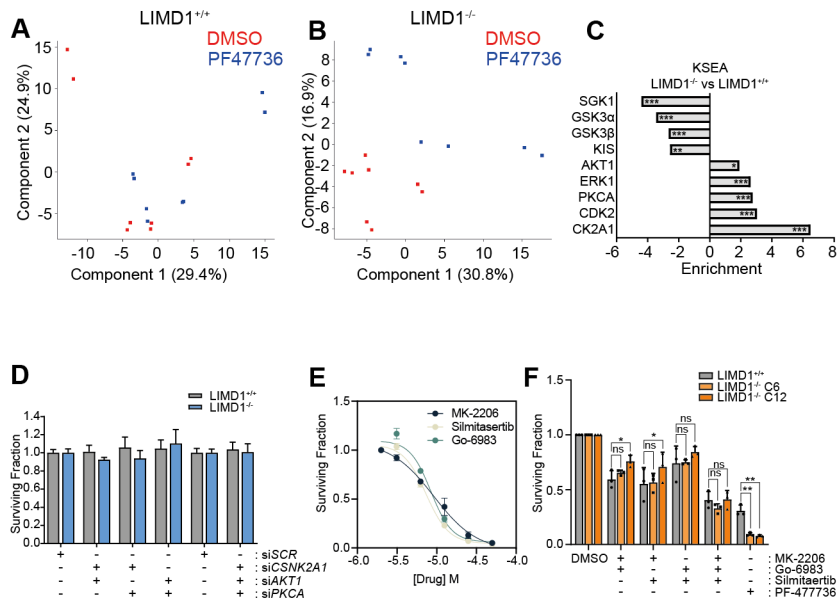

1

2 Figure S3

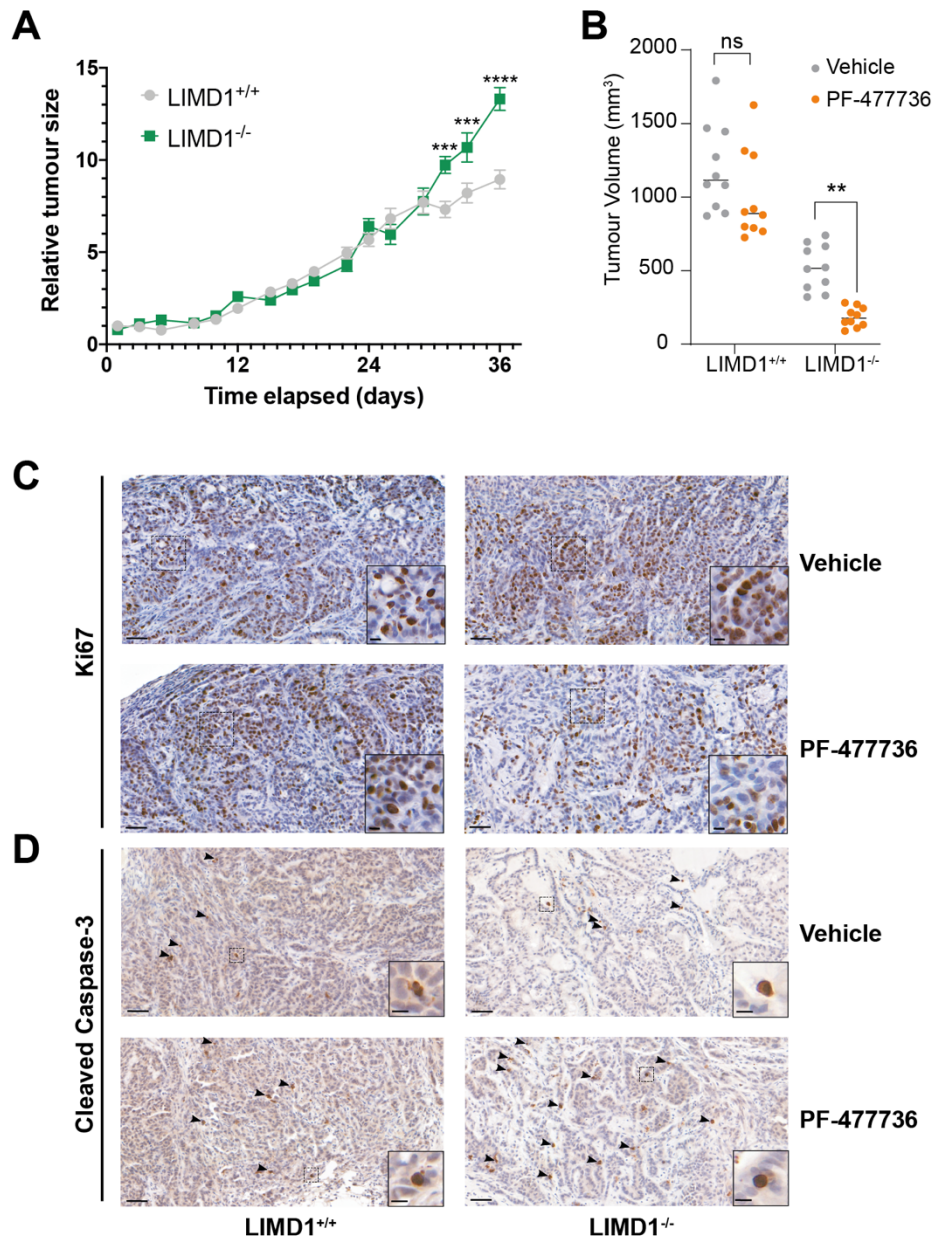

1

2 Figure S4
